# Supplementary material for: Distribution, treatment outcome and genetic diversity of Leishmania species in military personnel from Colombia with cutaneous leishmaniasis
Source: PubMed Central journal article supplement (PMC7724885; doi:10.1186/s12879-020-05529-y), 2020-12-09
Supplement: 12879_2020_5529_MOESM1_ESM.pdf [file 12879_2020_5529_MOESM1_ESM.pdf]

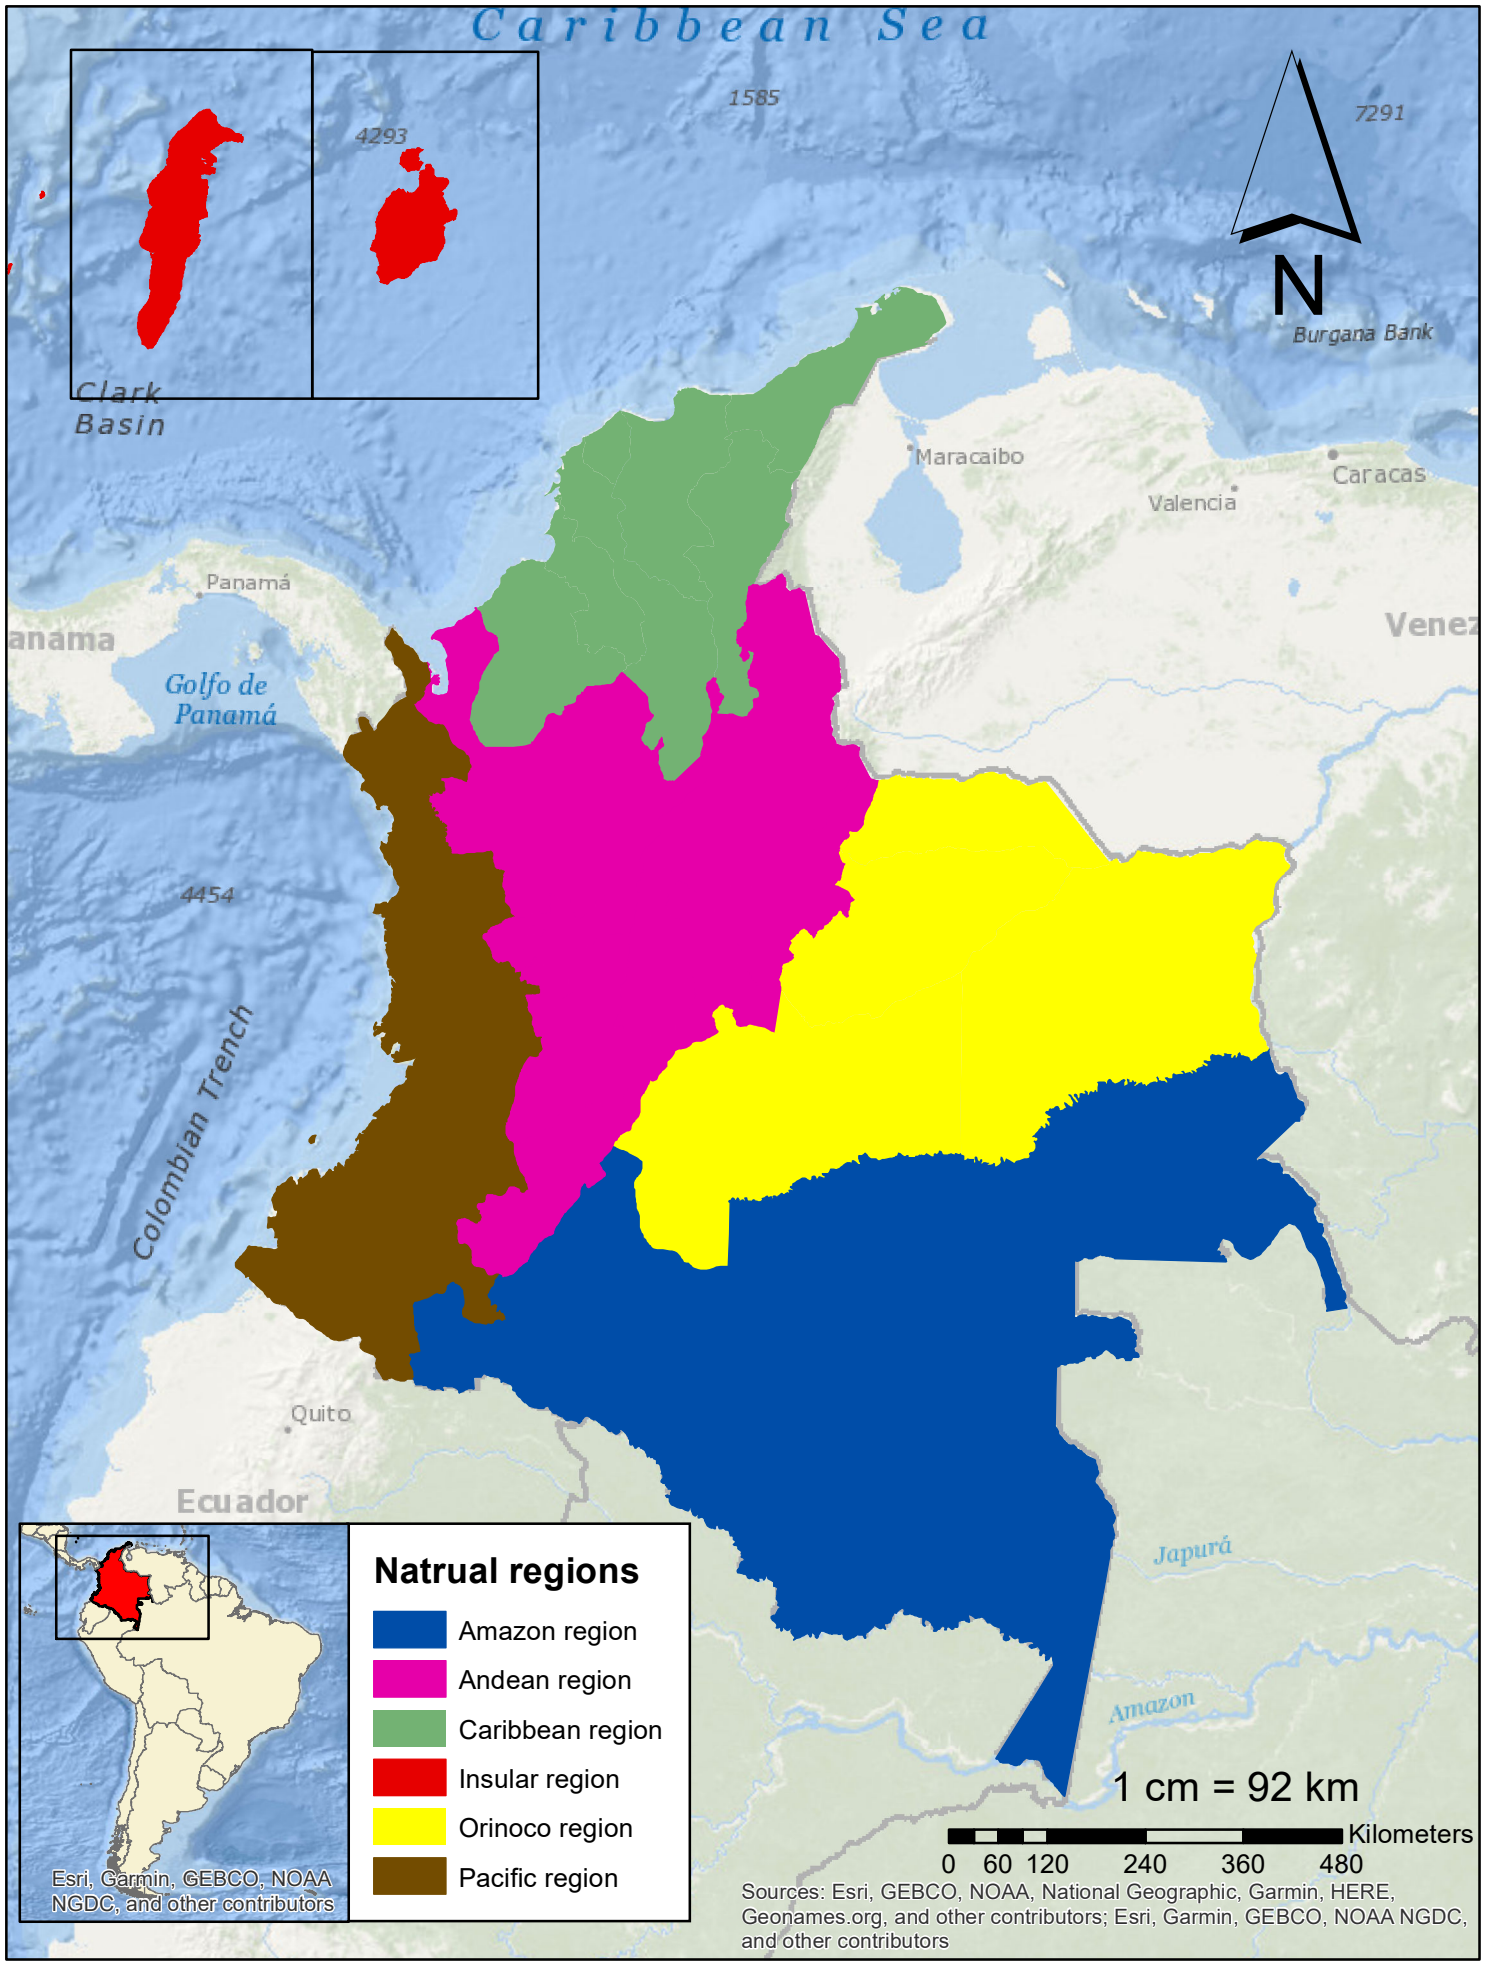

Caribbean Sea

1585

7291

4293

Clark Basin

Burgana Bank

Maracaibo

Valencia

Caracas

Panamá

Golfo de Panamá

Venezuela

4454

Colombian Trench

Quito

Ecuador

Japurá

Amazon

1 cm = 92 km

0 60 120 240 360 480 Kilometers

**Natural regions**

- Amazon region
- Andean region
- Caribbean region
- Insular region
- Orinoco region
- Pacific region

Esri, Garmin, GEBCO, NOAA NGDC, and other contributors

Sources: Esri, GEBCO, NOAA, National Geographic, Garmin, HERE, Geonames.org, and other contributors; Esri, Garmin, GEBCO, NOAA NGDC, and other contributors
